# Supplementary material for: Ceria-based nanotheranostic agent for rheumatoid arthritis
Source: PubMed Central journal article supplement (PMC7667692; doi:10.7150/thno.49069), 2020-10-25
Supplement: thnov10p11863s1.pdf [file thnov10p11863s1.pdf]

**Supplementary Materials for:**

**Ceria-based nanotheranostic agent for rheumatoid arthritis**

Irina Kalashnikova<sup>1†</sup>, Seock-Jin Chung<sup>1†</sup>, Md Nafiujjaman<sup>1</sup>, Meghan L. Hill<sup>1</sup>, Mzingaye E. Siziba<sup>1</sup>, Christopher H. Contag<sup>1,2</sup>, and Taeho Kim<sup>1\*</sup>

<sup>1</sup>*Department of Biomedical Engineering and the Institute for Quantitative Health Science & Engineering, <sup>2</sup>Department of Microbiology and Molecular Genetics, Michigan State University, East Lansing, MI 48824, USA*

\*Corresponding Author: [kimtae47@msu.edu](mailto:kimtae47@msu.edu)

<sup>†</sup>*I.K. and S-J.C. contributed equally to this work.*

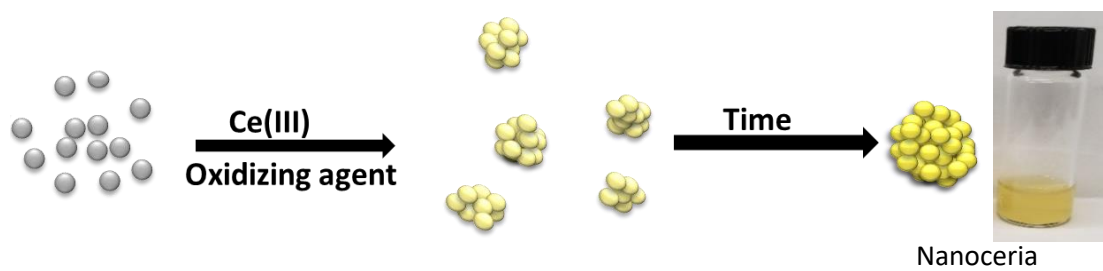

**Figure S1.** Schematic representation for nanoceria synthesis without albumin substrate presence. The inset shows a picture of nanoparticle (nanoceria) suspension from this synthesis, which is turbid due to the low solubility.

| Signal                                                                   | Signal identity, relevant samples |
|--------------------------------------------------------------------------|-----------------------------------|
| <b>IR data (cm<sup>-1</sup>; s = shift; v = stretching; δ = bending)</b> |                                   |
| 3290 s 3281                                                              | v (N-H)                           |
| 1700–1600                                                                | v (C=O)                           |
| 1522 s 1537                                                              | v (C–N), δ(C-NH)                  |
| 1642 s 1645                                                              | α-helix of BSA                    |
| 1645, 1362                                                               | A-Ce <sup>3+</sup> complex        |
| 1348 s 1318                                                              | Ce=O, v(C–N), δ(C-NH)             |
| 1039 to 1041                                                             | Ce=O                              |
| 928                                                                      | N (C-C) proline, valine           |
| 851 s 847, 843 s 838,                                                    | δ,v (Ce-O)                        |
| 825                                                                      | v (Ce-O-C)                        |
| 729 s 730                                                                | v (Ce–O–Ce)                       |
| 634 s 627, 619 s 618                                                     | δ (Ce–O–C)                        |
| 581 s 584, 548 s 551, 524 s 523                                          | v (Ce-O)                          |
| <b>UV-Vis (a.u.; s = shift)</b>                                          |                                   |
| 232, 278                                                                 | Albumin                           |
| 249 s 253                                                                | Ce <sup>3+</sup>                  |
| 273 s 271                                                                | Ce <sup>3+</sup>                  |
| 305 s 307                                                                | Ce <sup>4+</sup>                  |
| 526                                                                      | Doping by ceria                   |
| 667 s 728                                                                | ICG                               |

**Table S1.** Summarized data on spectroscopies analysis for FT-IR (top) of A-nanoceria and for UV-Vis (bottom) of A-nanoceria-ICG (associated with **Figure 3A-B**).

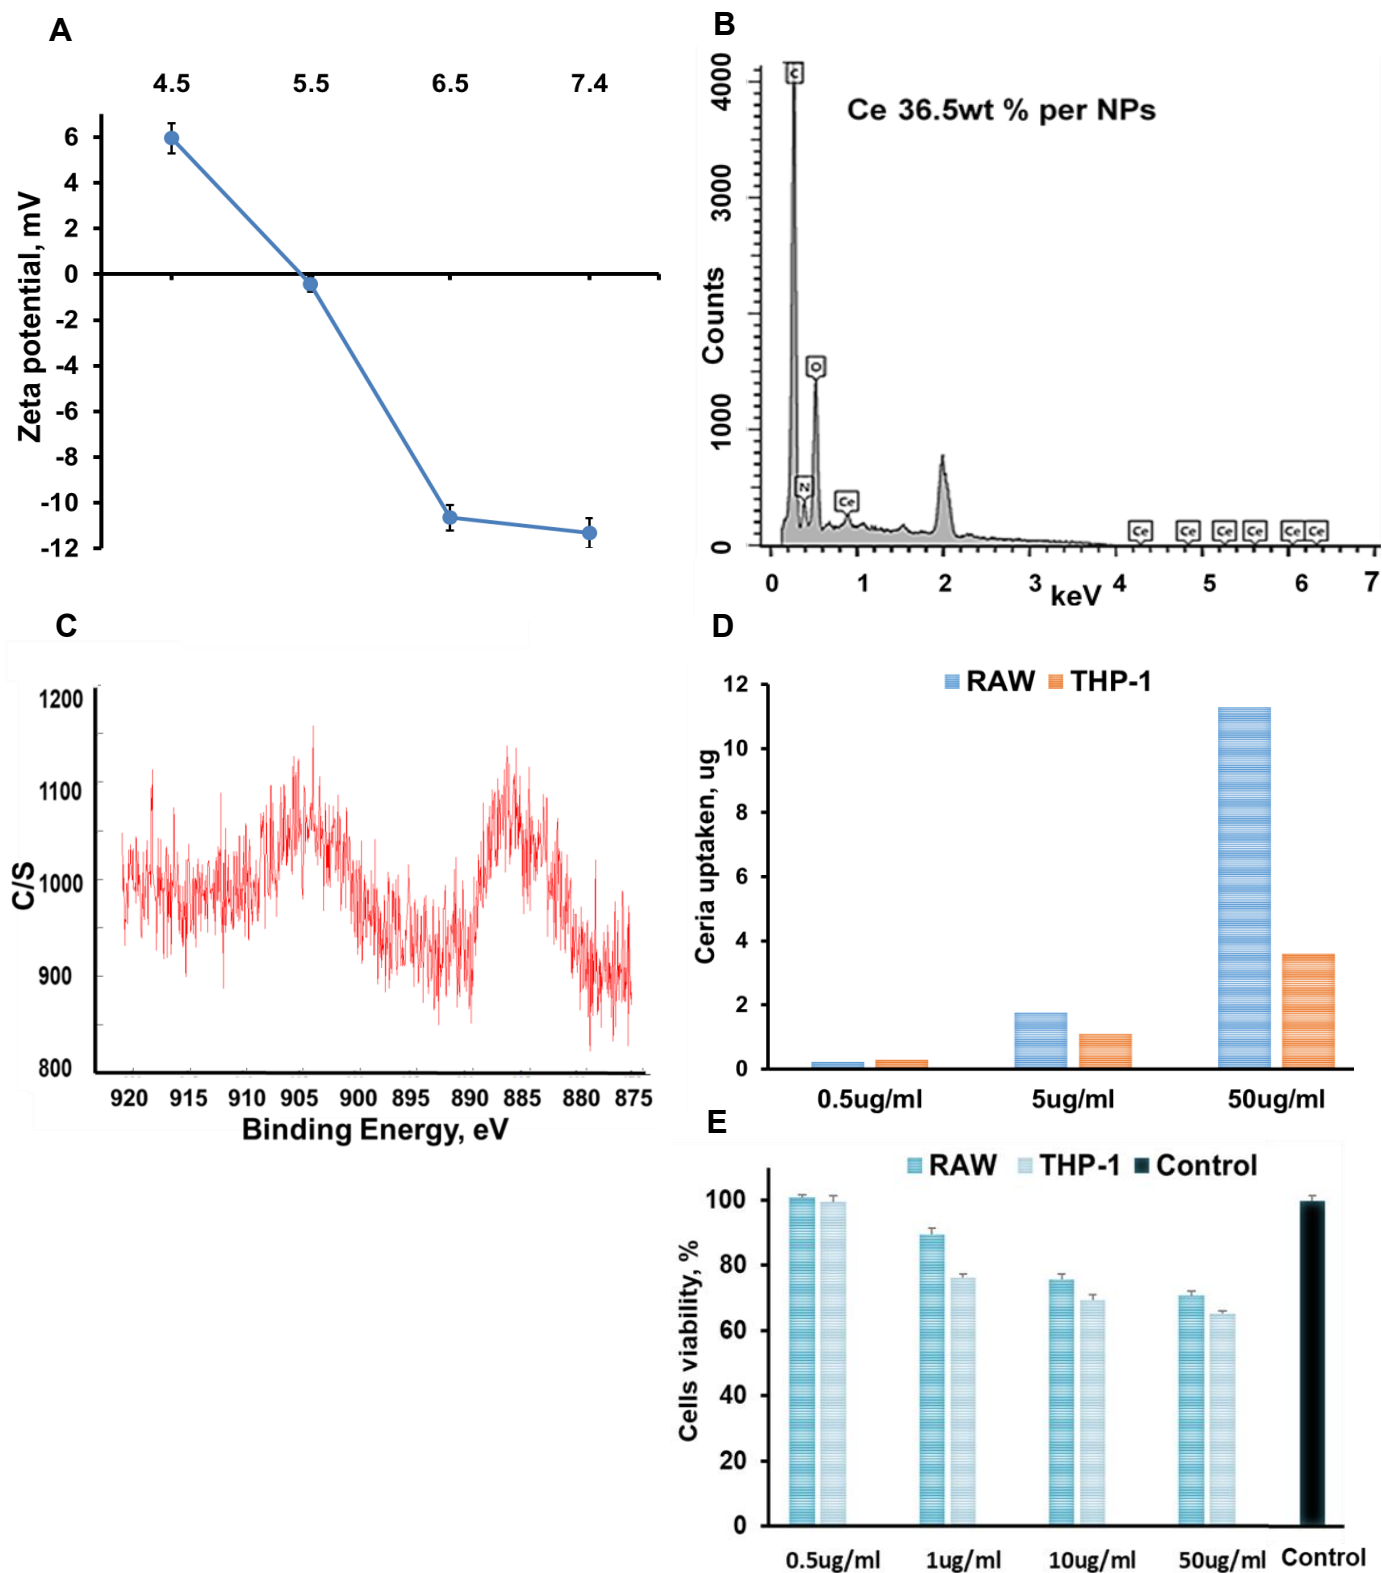

**Figure S2.** Additional characterization of (A) Zeta potential of A-nanoceria at different pH (4.5, 5.5, 6.5, and 7.4); (B) EDS analysis determined about 36.5% of Ce element per NPs (A-nanoceria); (C) Full XPS spectra of A-nanoceria (related to fitted data presented on **Figure 4C**); (D) NPs uptake measured by Ce signal was detected by ICP-OES. RAW 264.7 and THP-1 cells were treated with different concentrations of A-nanoceria (0.5, 5, and 50 ug/mL) and the results showed a concentration-dependent uptake, more intensive in the case of RAW cells;

**(E)** MTT cytotoxicity assay (black: untreated cells, blue: RAW 267.4 cells and light blue: THP-1 cells treated with 0.5, 1, 10, 50  $\mu\text{g}/\text{mL}$  A-nanoceria, where  $N = 10$ , error bars = SD The 1.4 and 1.6-fold decrease in RAW and THP-1 cells, respectively, was revealed after treatment with 50  $\mu\text{g}/\text{mL}$  A-nanoceria.

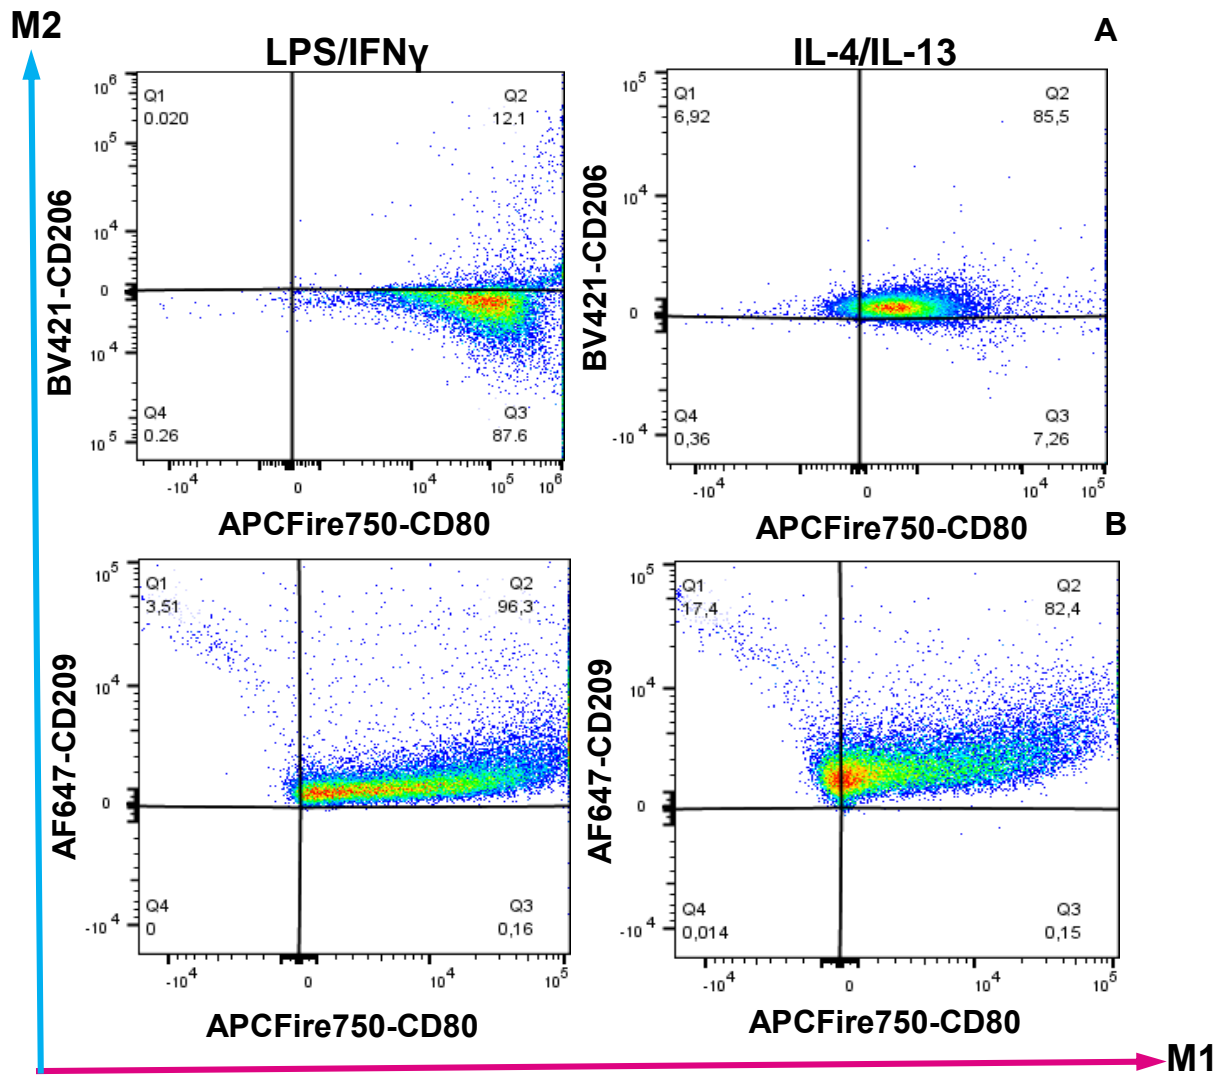

**Figure S3.** Flow cytometry analysis of (A) RAW 264.7 cells and (B) THP-1 cells: cells were treated with LPS/IFN- $\gamma$  and IL-4/IL-13 for 24 h moving cells to M1- and M2-like phenotypes, respectively (see Q2/Q3 and Q1).

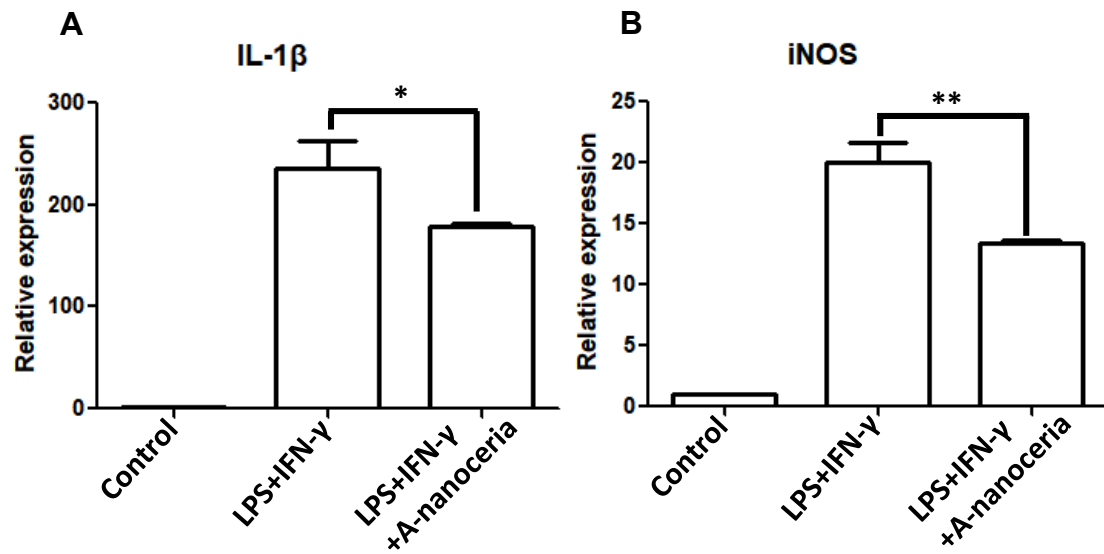

**Figure S4.** qRT-PCR analysis of (A) IL-1 $\beta$  and (B) iNOS expression in RAW 264.7 cells: untreated, treated with LPS/IFN- $\gamma$  and LPS/IFN- $\gamma$ /A-nanoceria for 24 h. Both M1-phenotype (activated by LPS/IFN- $\gamma$ ) markers, IL-1 $\beta$  and iNOS, were decreased by A-nanoceria treatment (N = 3, error bar = SD, \*p < 0.05, \*\*p < 0.005).

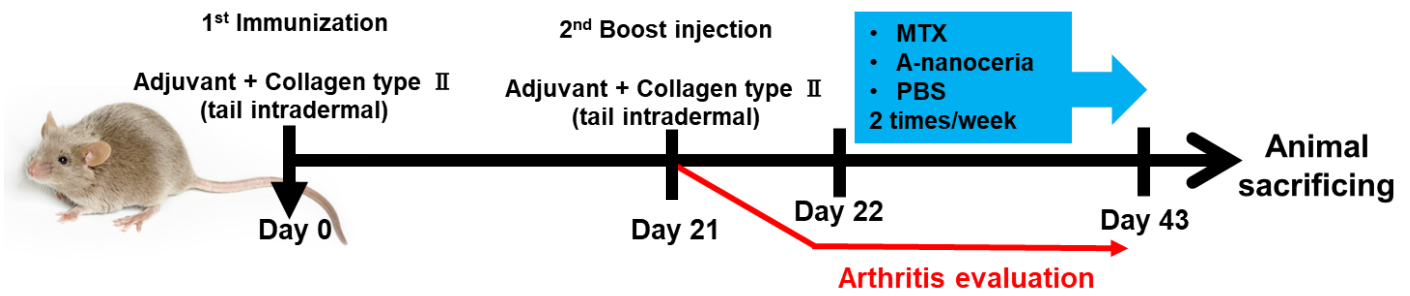

**Figure S5.** Animal study: full time range including CIA model preparation and further study with RA clinical scoring evaluation. The adjuvant and collagen II were injected intra-dermally twice at day 0 and day 21, after that animals developed RA signs and study started with intra-articular injection of A-nanoceria or PBS. MTX solution was injected intraperitoneally. Animal were measured their clinical scores three time a week from 21 day to 43 day of the study.



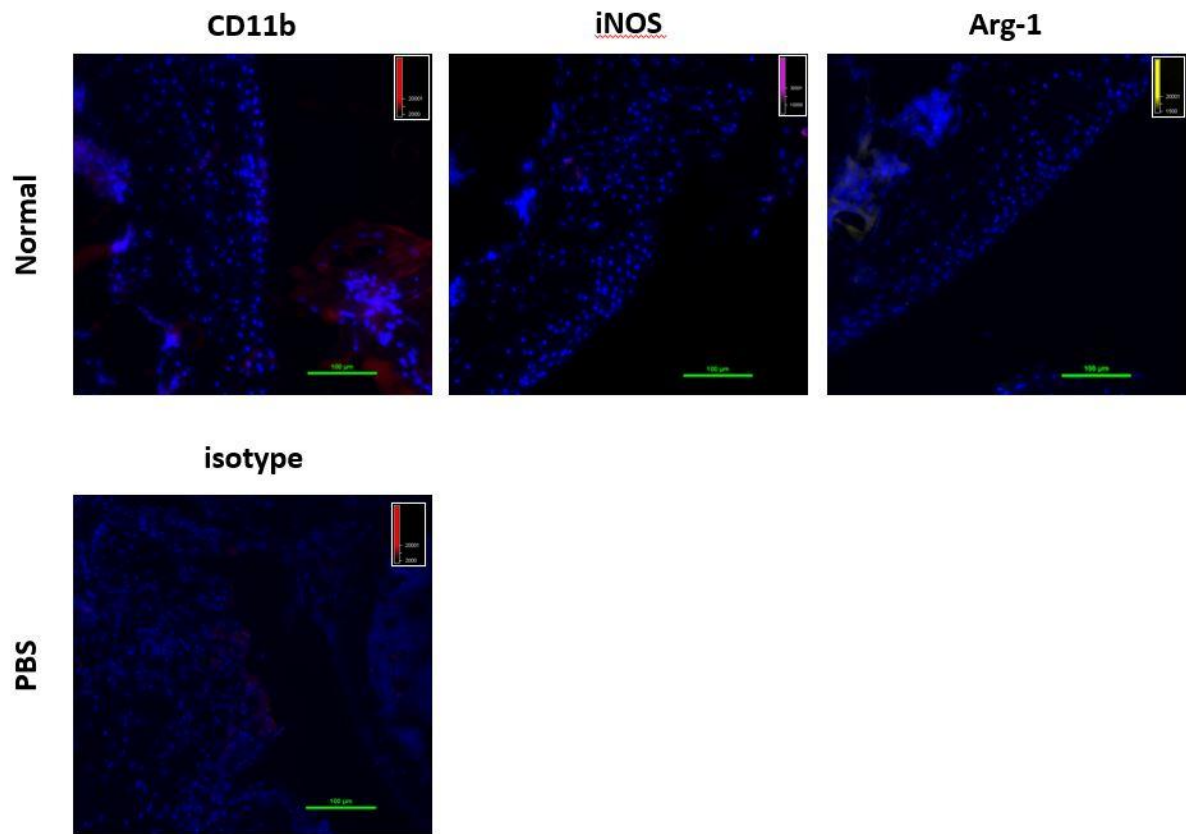

**Figure S6.** Immunohistology analysis of tissue sections harvested from normal mice: with no treatment or after treatment with PBS. DAPI is in blue, CD11b and isotype are in red, iNOS is in pink, and Arg-1 is in yellow. Scale bar = 100µm.

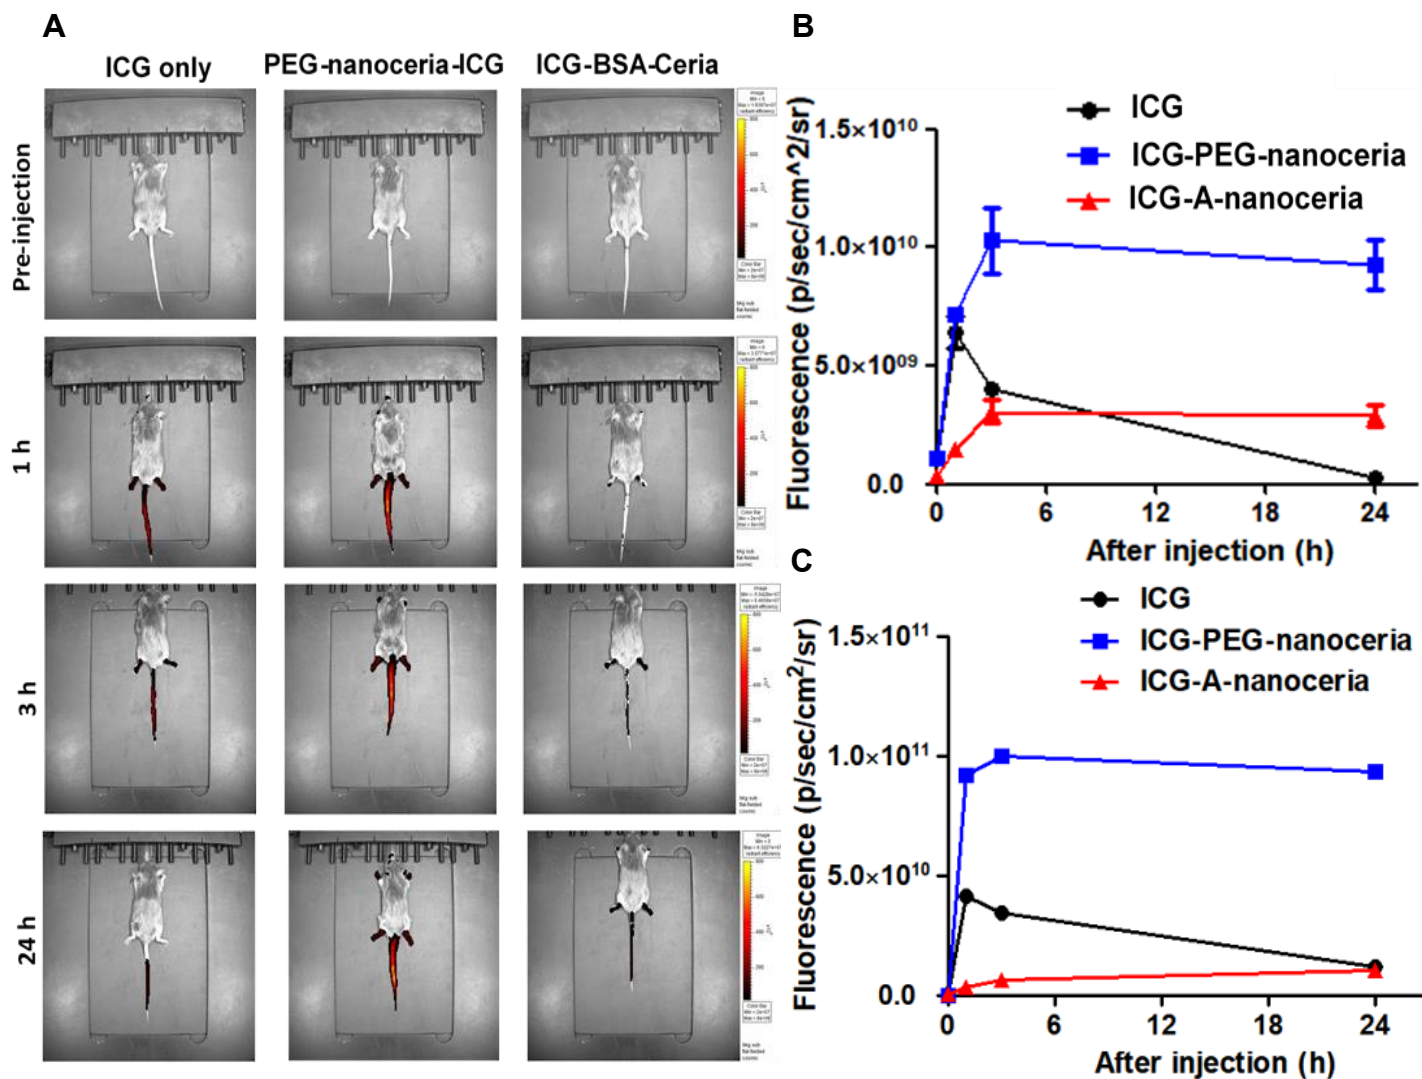

**Figure S7.** IVIS analysis of ICG signal for three formulations: ICG; ICG-PEG-nanoceria; ICG-A-nanoceria. **(A)** images of ICG signal in CIA animals after tail vein injection at 1, 3, and 24 h time points; **(B)** the plots of raw ICG signal intensity in the arthritic paws of CIA mice by three formulations from **(A)** where  $N = 3$ , error bars = SEM; **(C)** plot of raw ICG signal intensity in the tail of CIA mice by three formulations from **(A)**. Black: ICG; blue: ICG-PEG-nanoceria; Red: ICG-A-nanoceria.

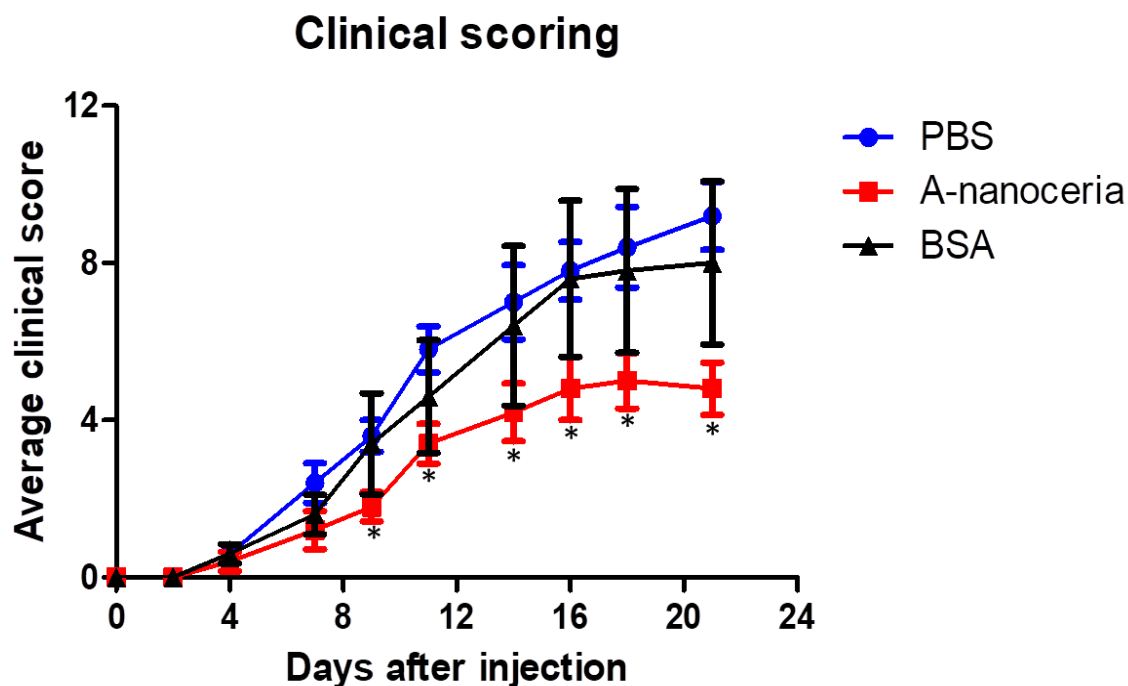

**Figure S8.** Clinical scoring alteration over 21 days course of CIA mice treatment with A-nanoceria and two controls (BSA and PBS). (N = 5 mice per group). After three weeks of the treatment course, A-nanoceria-ICG treated group (50  $\mu$ L, red line) showed significantly low clinical score than PBS and BSA control groups (50  $\mu$ L, blue and black lines, respectively). Albumin itself has no valuable effect on RA recovery (Error bars = SEM and p-value from Mann-Whitney U test: \*  $p < 0.05$  compared with PBS).

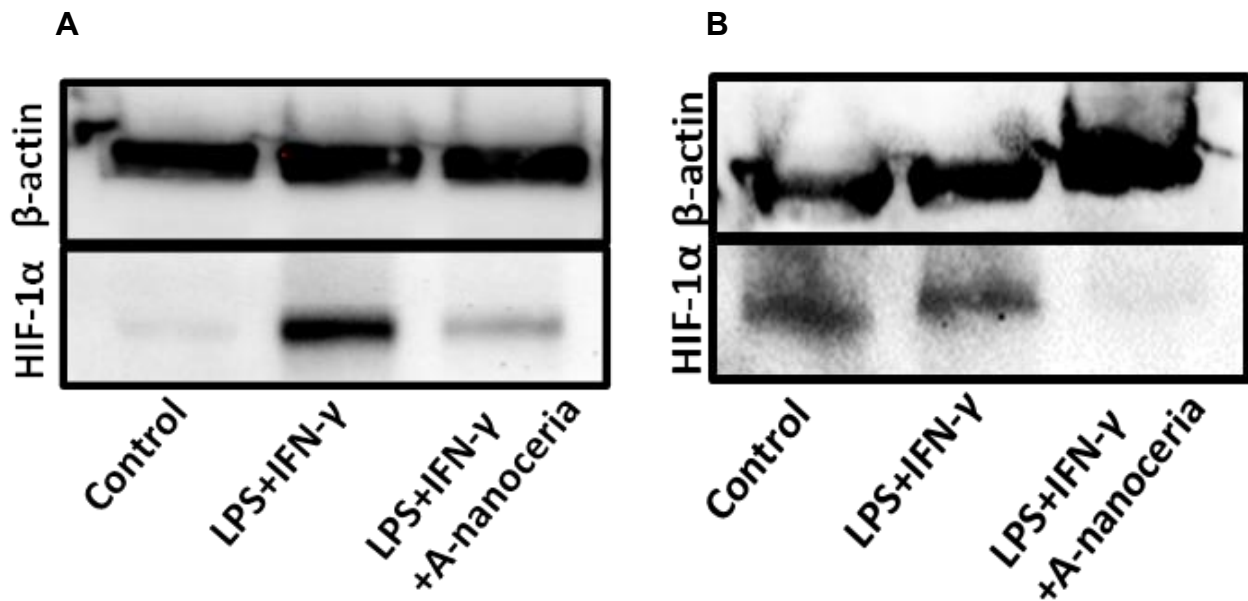

**Figure S9.** Western blot of HIF-1 $\alpha$  protein expression in (A) RAW 264.7 and (B) THP-1 cells: untreated, treated with LPS/IFN- $\gamma$ , and treated with LPS/IFN- $\gamma$ /A-nanoceria for 24 h. All samples were normalized to  $\beta$ -actin expression as an internal reference. Treatment of activated macrophage with A-nanoceria demonstrated downregulation of HIF-1 $\alpha$  expression level.
